# Supplementary material
Source: publisher figshare collection journal article supplement (https://karger.figshare.com/ndownloader/files/24690599)
Supplement: Supplementary file 1 [file 24690599]

**Supplementary table 2** Mean quality of life during follow-up

| BR-23 (Mean ±SD) | Total | | Cohort A | | Cohort B | |
| --- | --- | --- | --- | --- | --- | --- |
| **Body Image** |  |  |  |  |  |  |
| Total | n=78 | 69.8 ±22.8 | n=50 | 66.8 ±22.2 | n= 28 | 75.3 ±23.3 |
| 1 week after surgery | n=70 | 60.2 ±29.3 | n=47 | 55.4 ±27.1 | n=23 | 69.9 ±27.1 |
| 1 months after surgery | n=67 | 67.4 ±24.8 | n=44 | 63.1 ±24.4 | n=23 | 75.7 ±24.0 |
| 3 months after surgery | n=66 | 74.5 ±25.8 | n=42 | 73.4 ±8.0 | n=24 | 76.3 ±21.8 |
| 6 months after surgery | n=60 | 75.7 ±21.2 | n=40 | 75.2 ±20.5 | n=20 | 76.6 ±23.2 |
| 12 months after surgery | n=56 | 77.2 ±22.5 | n=36 | 79.4 ±19.8 | n=20 | 73.3 ±26.7 |
| **Sexual functioning** |  |  |  |  |  |  |
| Total | n=75 | 39.9 ±25.2 | n=50 | 40.2 ±23.2 | n=25 | 39.1 ±29.1 |
| 1 week after surgery | n=67 | 35.6 ±28.3 | n=47 | 35.1 ±28.1 | n=23 | 36.7 ±29.4 |
| 1 months after surgery | n=64 | 32.8 ±26.4 | n=44 | 28.4 ±21.7 | n=20 | 42.5 ±33.1 |
| 3 months after surgery | n=62 | 42.8 ±28.3 | n=42 | 45.6 ±26.3 | n=20 | 40.0 ±32.6 |
| 6 months after surgery | n=57 | 48.5 ±29.3 | n=40 | 50.0 ±26.4 | n=17 | 45.1 ±35.7 |
| 12 months after surgery | n=53 | 44.7 ±27.3 | n=36 | 50.5 ±24.4 | n=17 | 32.4 ±29.7 |
